# Supplementary material
Source: Springer Nature journal article supplement (https://www.springermedizin.de/resource/supplementary/12958_2009_617_MOESM1_ESM.pdf/9568104)

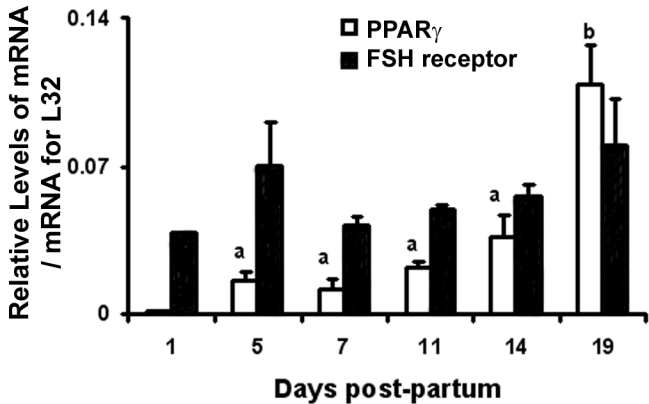

Supplement: MOESM1 [file 9568104]
